# Supplementary material for: Unravelling Novel Phytochemicals and Anticholinesterase Activity in Irish Cladonia portentosa
Source: MDPI journal article supplement (doi:10.3390/molecules28104145), 2023-05-17
Supplement: s1 [file s1]

# Unravelling novel phytochemicals and anti-cholinesterase activity in Irish *Cladonia portentosa*

Shipra Nagar <sup>1,\*</sup>, Maria Pigott <sup>1</sup>, Wirginia Kukuła-Koch <sup>2</sup> and Helen Sheridan <sup>1,\*</sup>

<sup>1</sup> NatPro Centre, School of Pharmacy and Pharmaceutical Sciences, Trinity College Dublin, Dublin 02, D02 PN40 Dublin, Ireland

<sup>2</sup> Department of Pharmacognosy, Medical University of Lublin, 1 Chodzki street, 20-093 Lublin, Poland

\* Correspondence: nagars@tcd.ie or shhipranagar@gmail.com (S.N.); hsheridn@tcd.ie (H.S.)

## Supplementary Information

### Appendix A: MS/MS spectra of LCMS Chromatogram (figure 2)

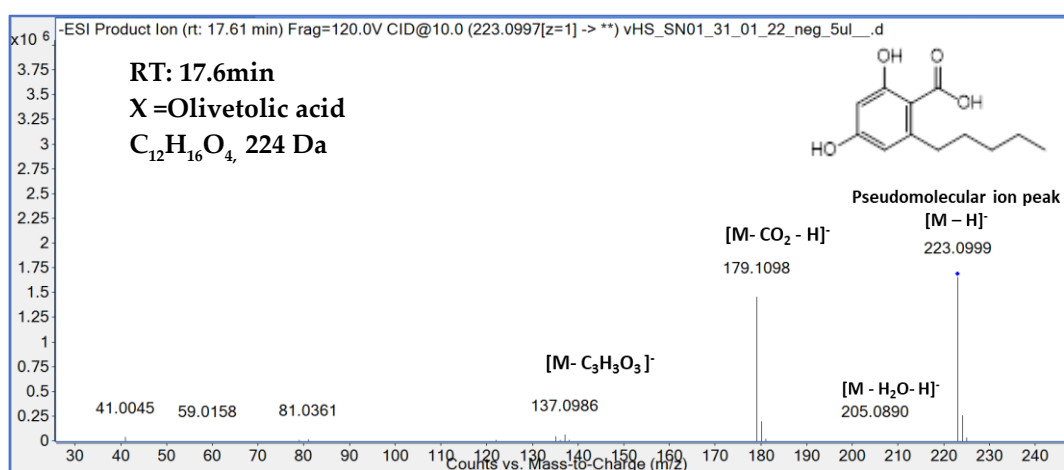

**Figure S1:** MS/MS spectrum corresponding to the peak X at RT=17.6 min in LC-MS chromatogram (Figure 2 in manuscript), tentatively identified as olivetolic acid

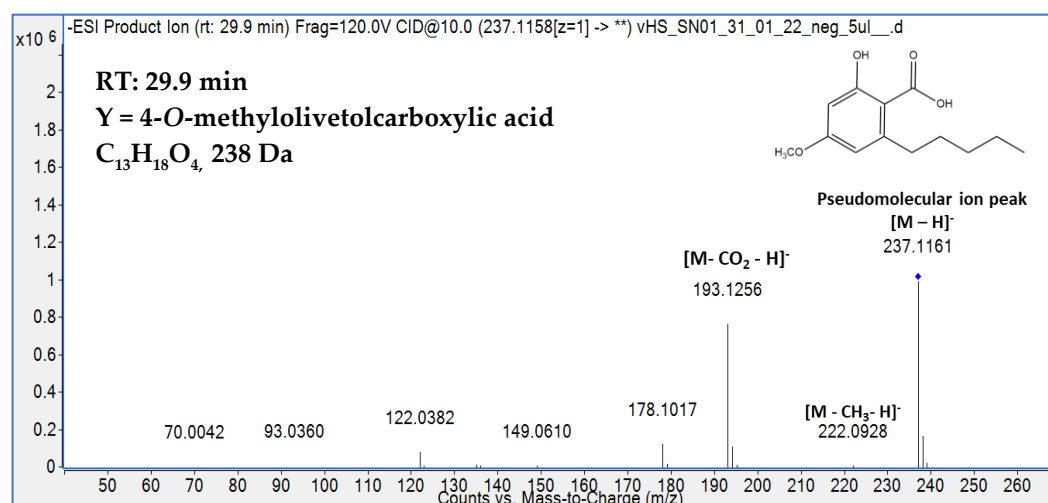

**Figure S2:** MS/MS spectrum corresponding to the peak Y at RT=29.9 min in LC-MS chromatogram (Figure 2 in manuscript), tentatively identified as 4-O-methylolivetolcarboxylic acid

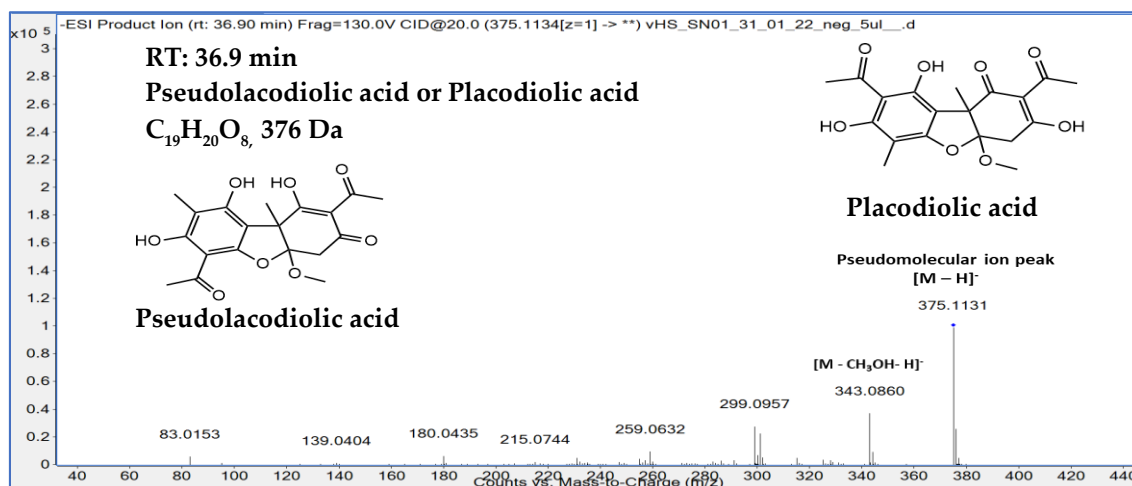

**Figure S3:** MS/MS spectrum corresponding to the peak at RT=36.9 min in LC-MS chromatogram (Figure 2 in manuscript), tentatively identified as pseudoplacodiolic acid or placodiolic acid

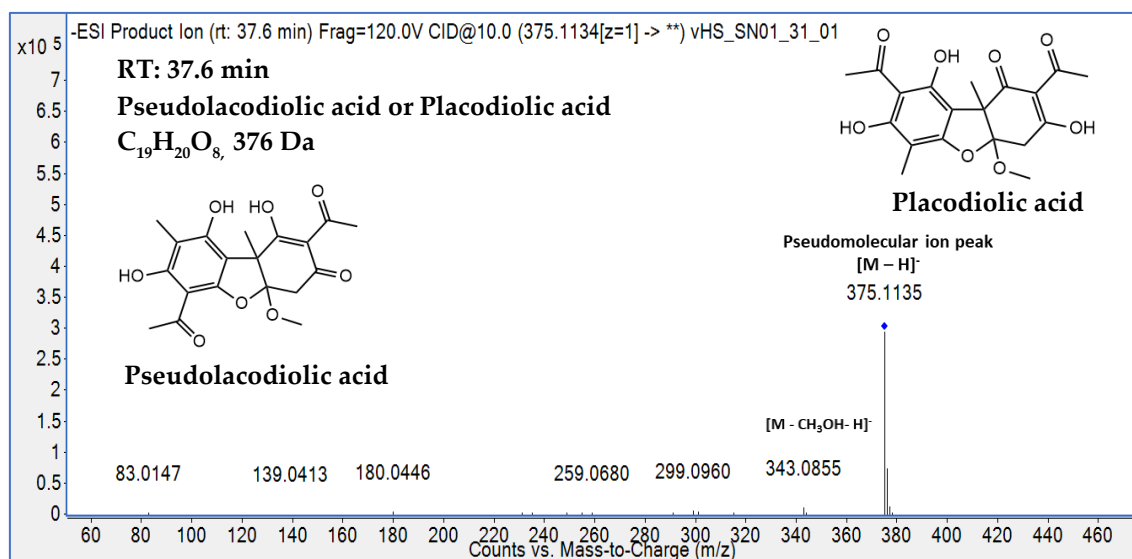

**Figure S4:** MS/MS spectrum corresponding to the peak at RT=37.6 min in LC-MS chromatogram (Figure 2 in manuscript), tentatively identified as pseudoplacodiolic acid or placodiolic acid

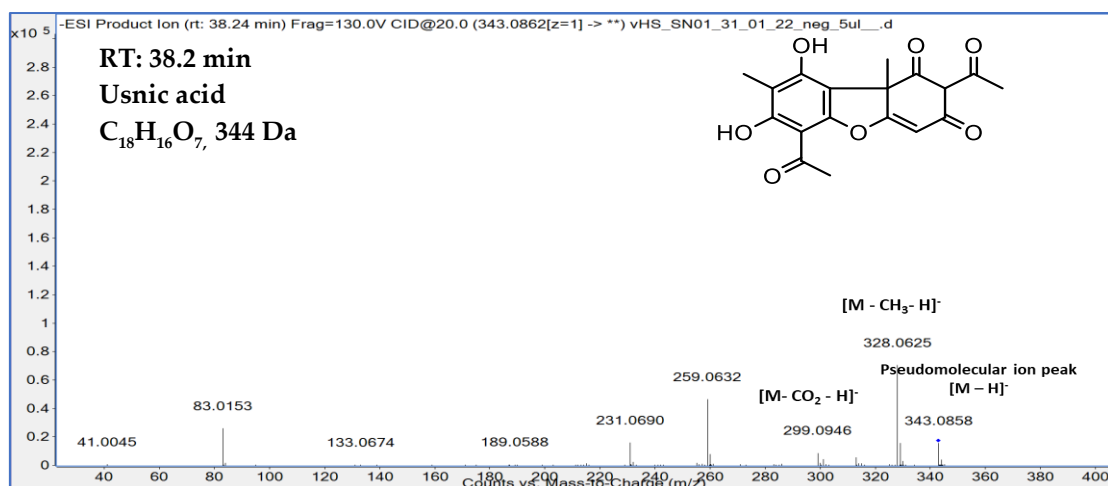

**Figure S5:** MS/MS spectrum corresponding to the peak at RT= 38.2 min in LC-MS chromatogram (Figure 2 in manuscript), tentatively identified as usnic acid

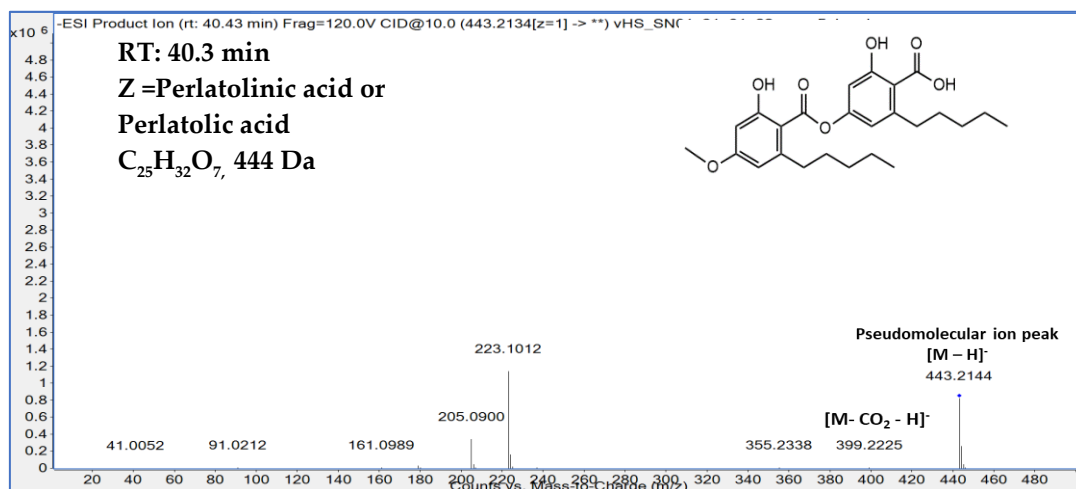

**Figure S6:** MS/MS spectrum corresponding to the peak Z at RT= 40.3 min in LC-MS chromatogram (Figure 2 in manuscript), tentatively identified as perlatolic or perlatolinic acid

## Appendix B: ESI-MS spectra of Isolated Compounds

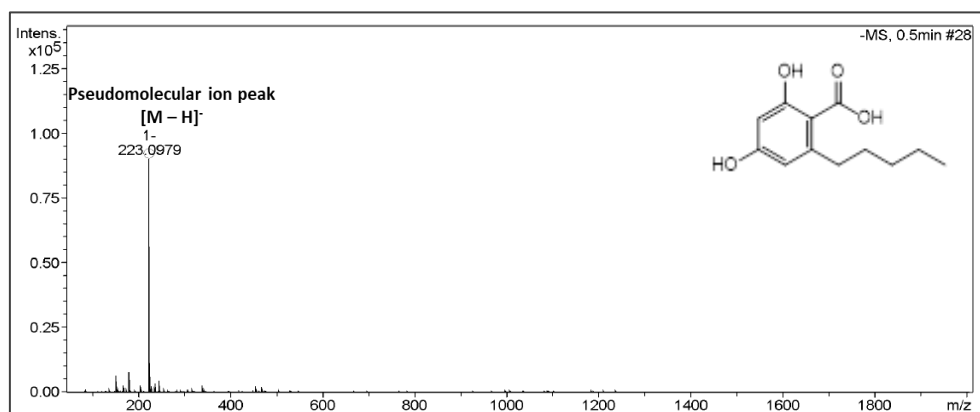

**Figure S7:** ESI-MS spectrum of isolated olivetolic acid in negative ion mode

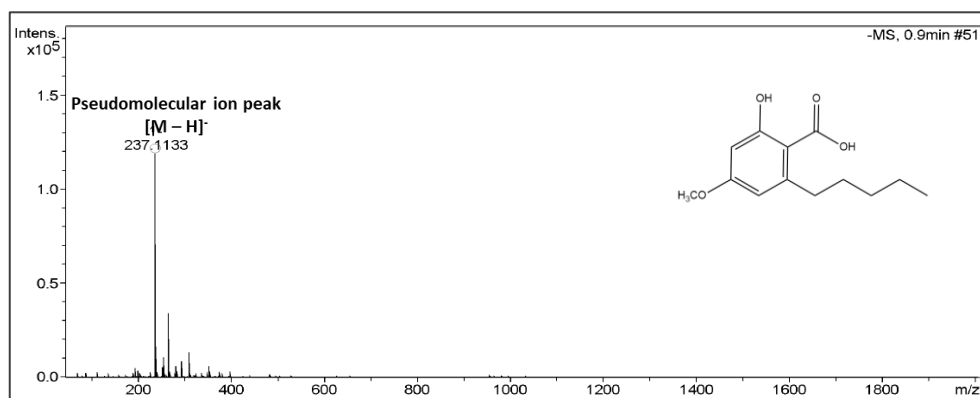

**Figure S8:** ESI-MS spectrum of isolated 4-*O*-methylolivetolcarboxylic acid in negative ion mode

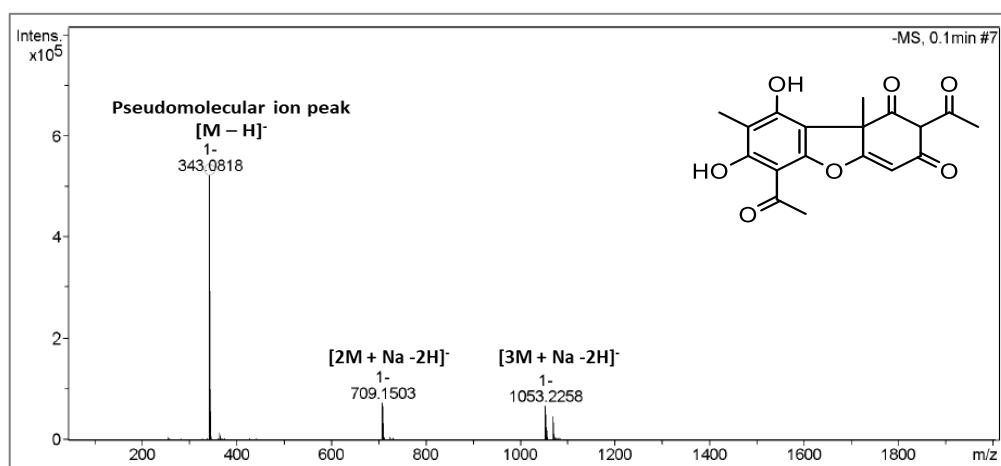

**Figure S9:** ESI-MS spectrum of isolated usnic acid in negative ion mode

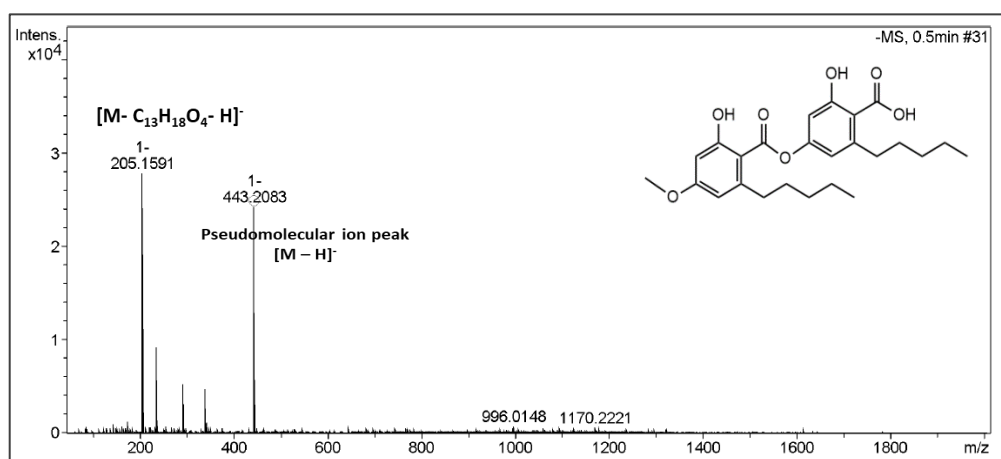

**Figure S10:** ESI-MS spectrum of isolated perlatolic or perlatolinic acid in negative ion mode

## Appendix C: NMR Assignment of Isolated Compounds

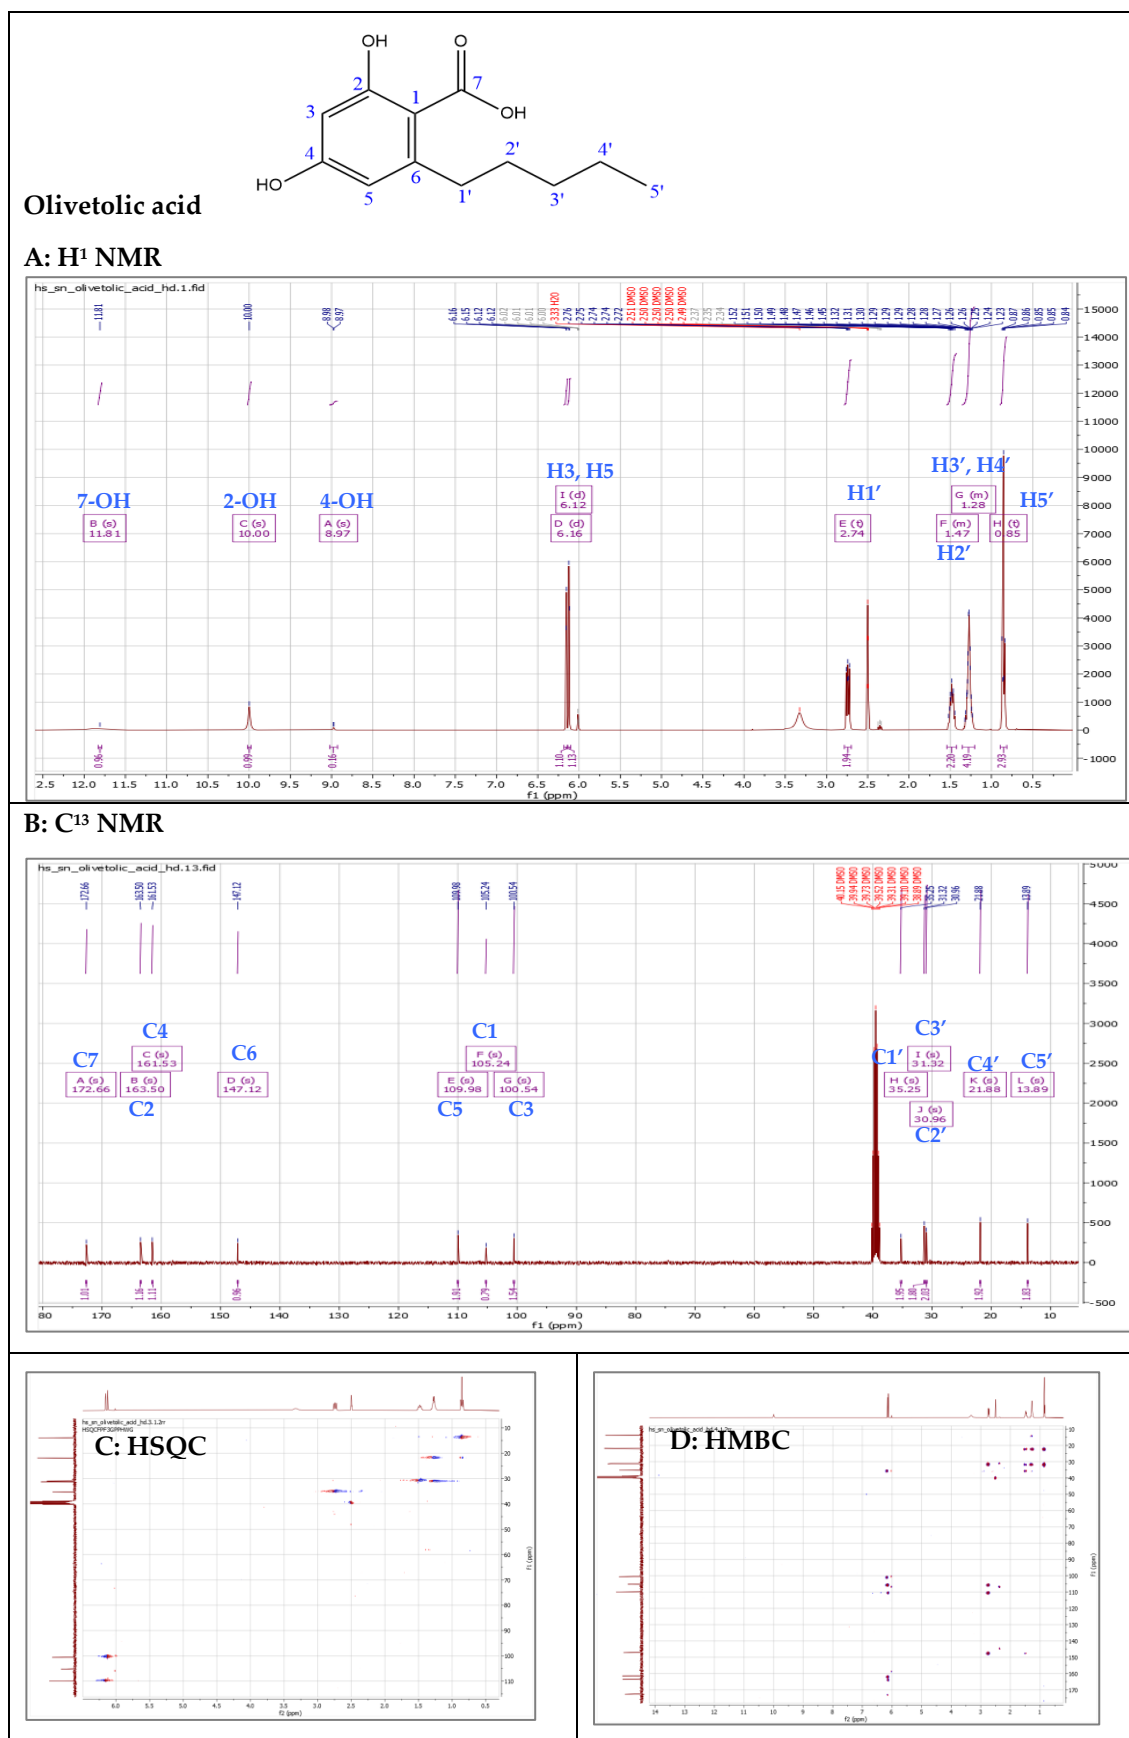

Figure S11: NMR spectra of isolated olivetolic acid

**Table S1:** HMBC based assignment of olivetolic acid

| Position | $\delta$ H (ppm) | $\delta$ C (ppm) | HMBC correlations                                          |
|----------|------------------|------------------|------------------------------------------------------------|
| 1        | -                | 105.2            |                                                            |
| 2-OH     | 10.00 (s)        | 163.5            |                                                            |
| 3        | 6.12 (d)         | 100.5            | 163.5 (C2), 161.5 (C4), 105.2 (C1), 109.9 (C5)             |
| 4        | -                | -                |                                                            |
| 4-OH     | 8.97 (s)         | 161.5            |                                                            |
| 5        | 6.16 (d)         | 109.9            | 163.5 (C2), 161.5 (C4), 105.2 (C1), 100.5 (C3), 35.2 (C1') |
| 6        | -                | 147.1            |                                                            |
| 7        | -                | 172.7            |                                                            |
| 7-OH     | 11.81 (s)        | -                |                                                            |
| 8        | -                | -                |                                                            |
| 8-OH     | -                | -                |                                                            |
| 9-OH     | -                | -                |                                                            |
| 1'       | 2.74 (t)         | 35.2             | 31.3 (C3'), 31.0 (C2'), 109.9 (C5), 147.1 (C6), 105.2 (C1) |
| 2'       | 1.47 (m)         | 30.9             | 147.1 (C6), 35.2 (C1'), 31.3 (C3'), 21.8 (C4')             |
| 3'       | 1.28 (m)         | 31.3             | 21.8 (C4'), 13.9 (C1')                                     |
| 4'       | 1.28 (m)         | 21.8             | 31.3 (C3'), 13.9 (C1')                                     |
| 5'       | 0.85 (t)         | 13.9             | 31.3 (C3'), 21.8 (C4')                                     |

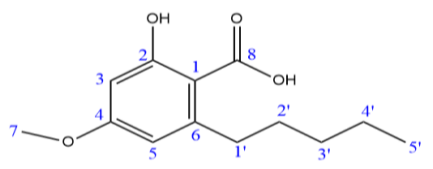

#### 4-O-methylolivetolcarboxylic acid

##### A: $^1\text{H}$ NMR

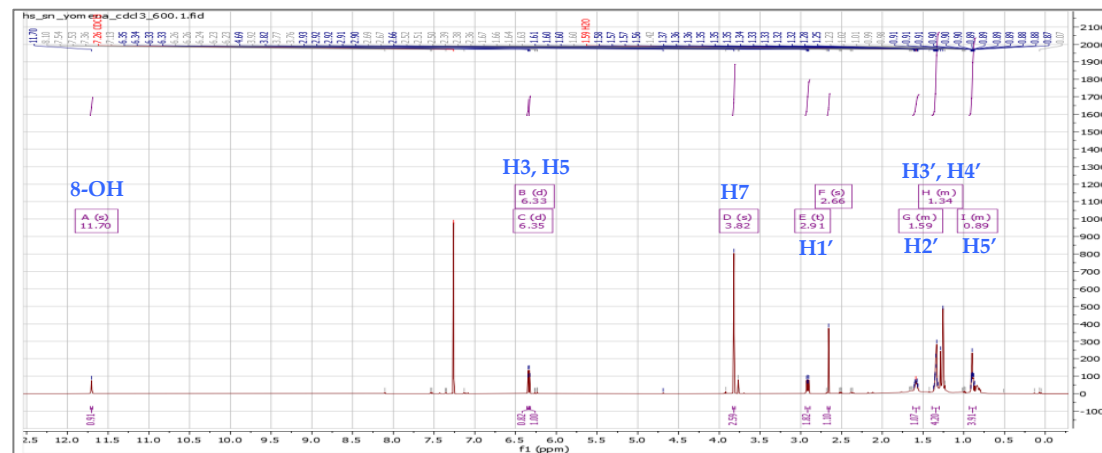

##### B: $^{13}\text{C}$ NMR

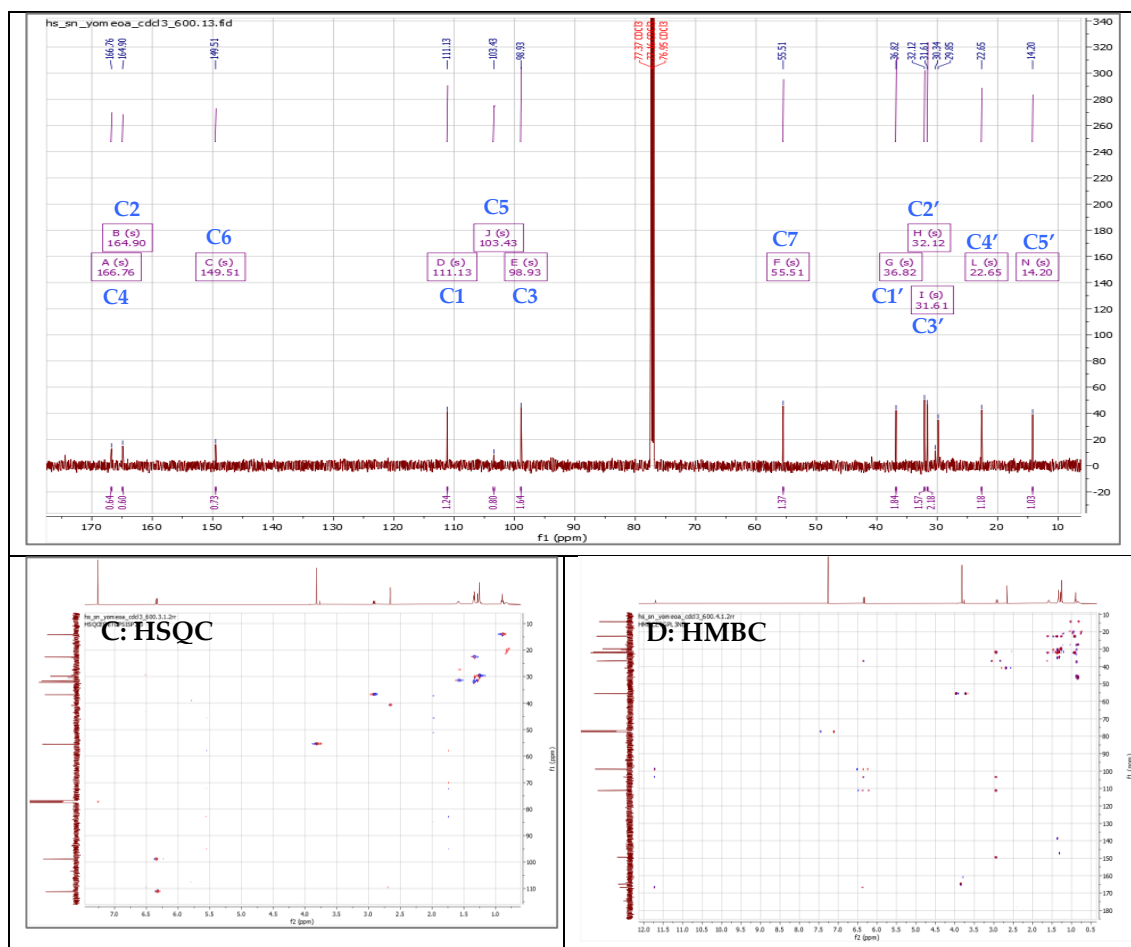

Figure S12: NMR spectra of isolated 4-O-methylolivetolcarboxylic acid

Table S2: HMBC based assignment of 4-O-methylolivetolcarboxylic acid

| Position | $\delta H$ (ppm) | $\delta C$ (ppm) | HMBC correlations                              |
|----------|------------------|------------------|------------------------------------------------|
| 1        | -                | 111.3            |                                                |
| 2-OH     | -                | 164.9            |                                                |
| 3        | 6.33 (d)         | 98.9             | 103.4 (C5)                                     |
| 4        | -                | 166.8            |                                                |
| 4-OH     | -                | -                |                                                |
| 5        | 6.35 (d)         | 103.4            | 36.8 (C1'), 103.4 (C5), 98.9 (C3), 166.8 (C4)  |
| 6        | -                | 149.5            |                                                |
| 7        | 3.82 (s)         | 55.5             | 164.9 (C2)                                     |
| 7-OH     | -                | -                |                                                |
| 8        | -                | -                |                                                |
| 8-OH     | 11.70 (s)        | -                | 98.9 (C3), 103.4 (C5)                          |
| 9-OH     | -                | -                |                                                |
| 1'       | 2.91 (t)         | 36.8             | 103.4 (C5), 111.3 (C1), 149.5 (C6), 31.6 (C3') |
| 2'       | 1.59 (m)         | 32.1             | 36.8 (C1'), 22.6 (C4')                         |
| 3'       | 1.34 (m)         | 31.6             | 149.5 (C6), 32.1 (C2'), 22.6 (C4')             |
| 4'       | 1.34 (m)         | 22.6             | 32.1 (C2')                                     |
| 5'       | 0.89 (m)         | 14.2             | 36.8 (C1'), 32.1 (C2'), 22.6 (C4')             |

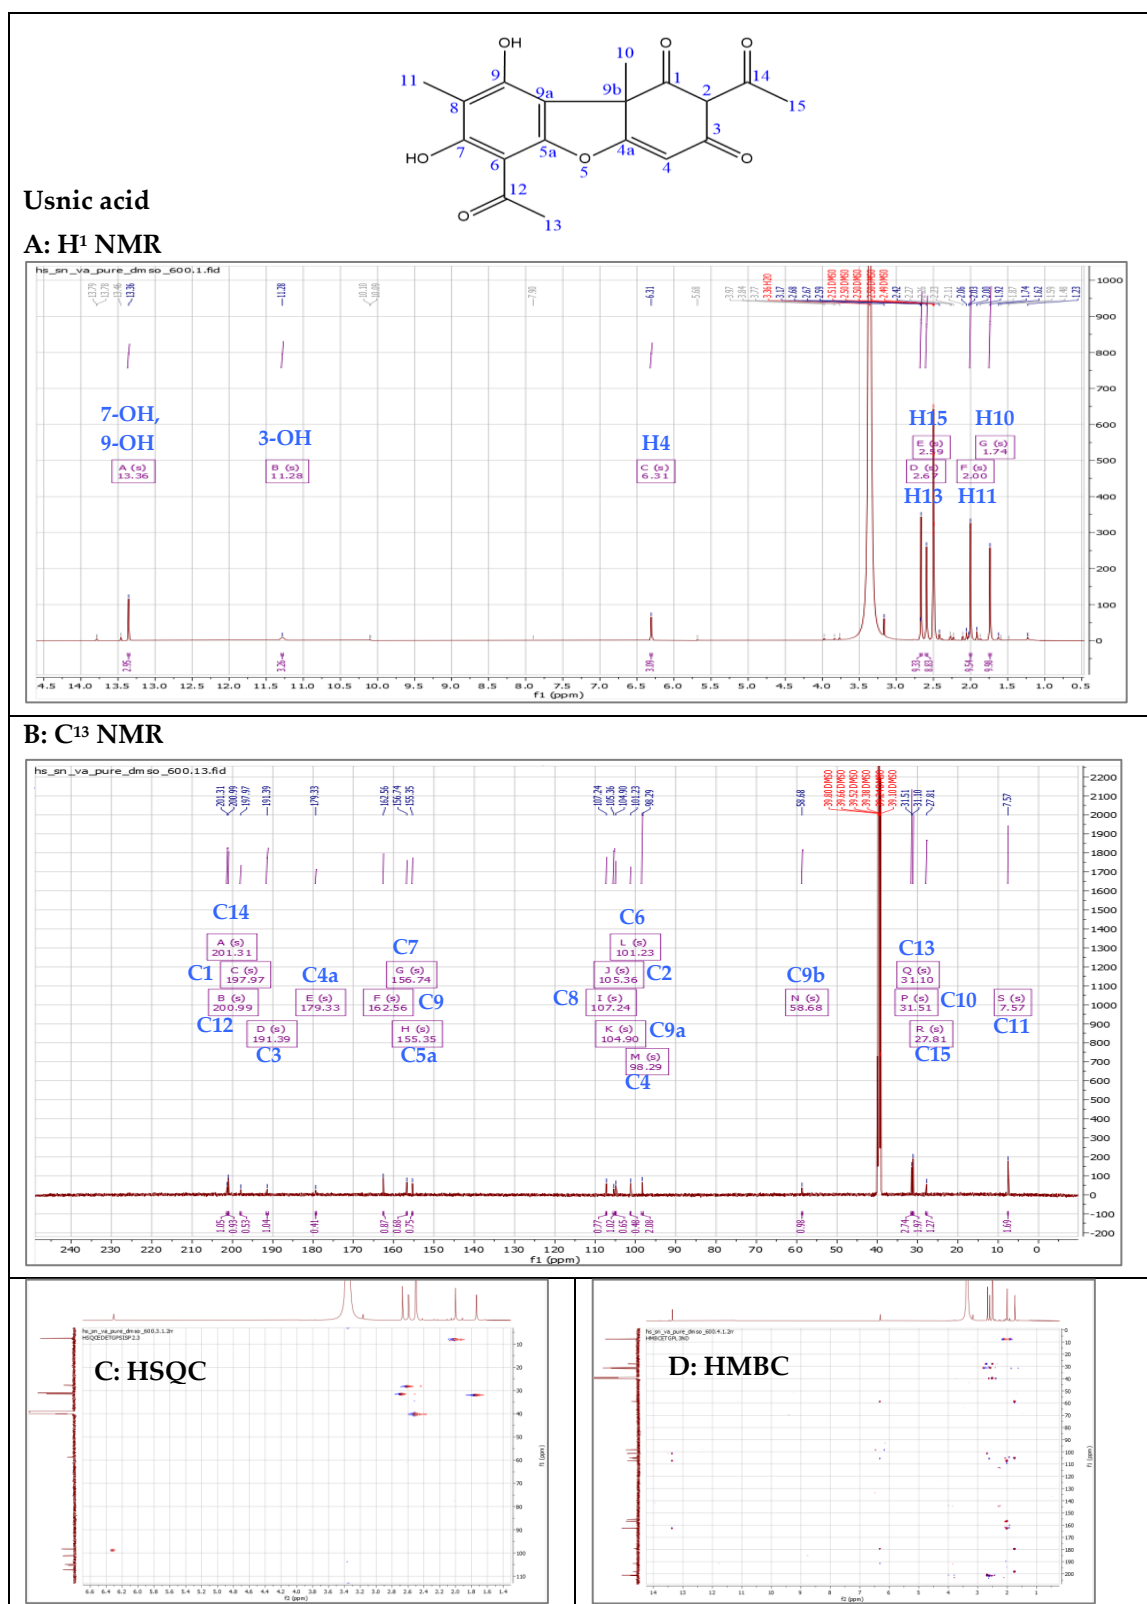

**Figure S13:** NMR spectra of isolated usnic acid

**Table S3:** HMBC based assignment of usnic acid

| Position | $\delta\text{H}$ (ppm) | $\delta\text{C}$ (ppm) | HMBC correlations |
|----------|------------------------|------------------------|-------------------|
|----------|------------------------|------------------------|-------------------|

|      |           |       |                                                  |
|------|-----------|-------|--------------------------------------------------|
| 1    | -         | 197.9 |                                                  |
| 2    | -         | 105.4 |                                                  |
| 3    | -         | 191.4 |                                                  |
| 3-OH | 11.28 (s) |       |                                                  |
| 4    | 6.31 (s)  | 98.3  | 58.7 (C9b), 105.4 (C2), 179.3 (C4a), 191.4 (C3)  |
| 4a   |           | 179.3 |                                                  |
| 5    | -         | -     |                                                  |
| 5a   |           | 155.4 |                                                  |
| 6    | -         | 101.2 |                                                  |
| 7    | -         | 156.7 |                                                  |
| 7-OH | 13.36 (s) | -     | 162.6 (C9), 107.2 (C8), 101.2 (C6)               |
| 8    | -         | 107.2 |                                                  |
| 9    |           | 162.6 |                                                  |
| 9-OH | 13.36 (s) |       | 162.6 (C9), 107.2 (C8)                           |
| 9a   | -         | 104.9 |                                                  |
| 9b   | -         | 58.7  |                                                  |
| 10   | 1.74 (s)  | 31.5  | 104.9 (C9a), 58.7 (C9b), 179.3 (C4a), 197.9 (C1) |
| 11   | 2.00 (s)  | 7.6   | 156.7 (C7), 162.6 (C9)                           |
| 12   | -         | 201.0 |                                                  |
| 13   | 2.67 (s)  | 31.1  | 201.0 (C12)                                      |
| 14   | -         | 201.3 |                                                  |
| 15   | 2.59 (s)  | 27.8  | 201.3 (C14)                                      |

# Perlatolic acid

## A: H<sup>1</sup> NMR

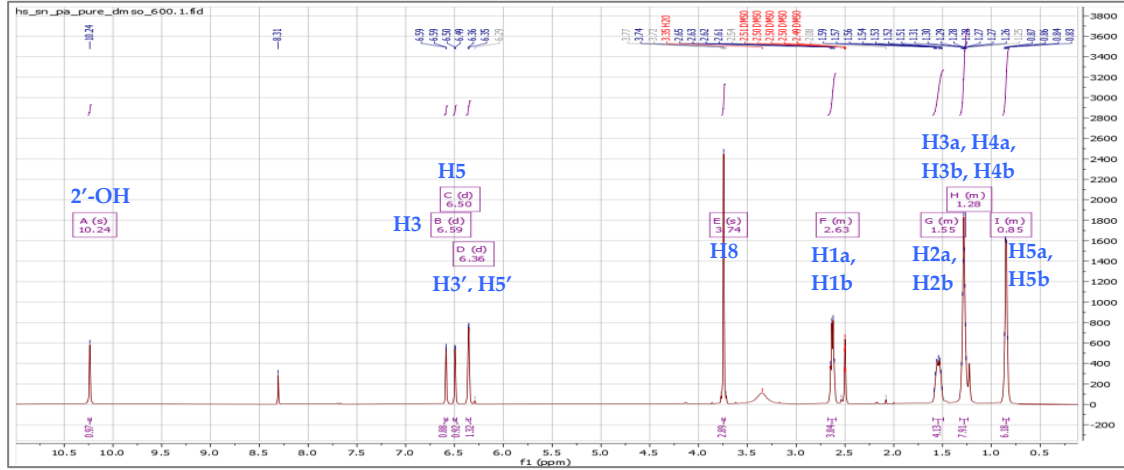

## B: C<sup>13</sup> NMR

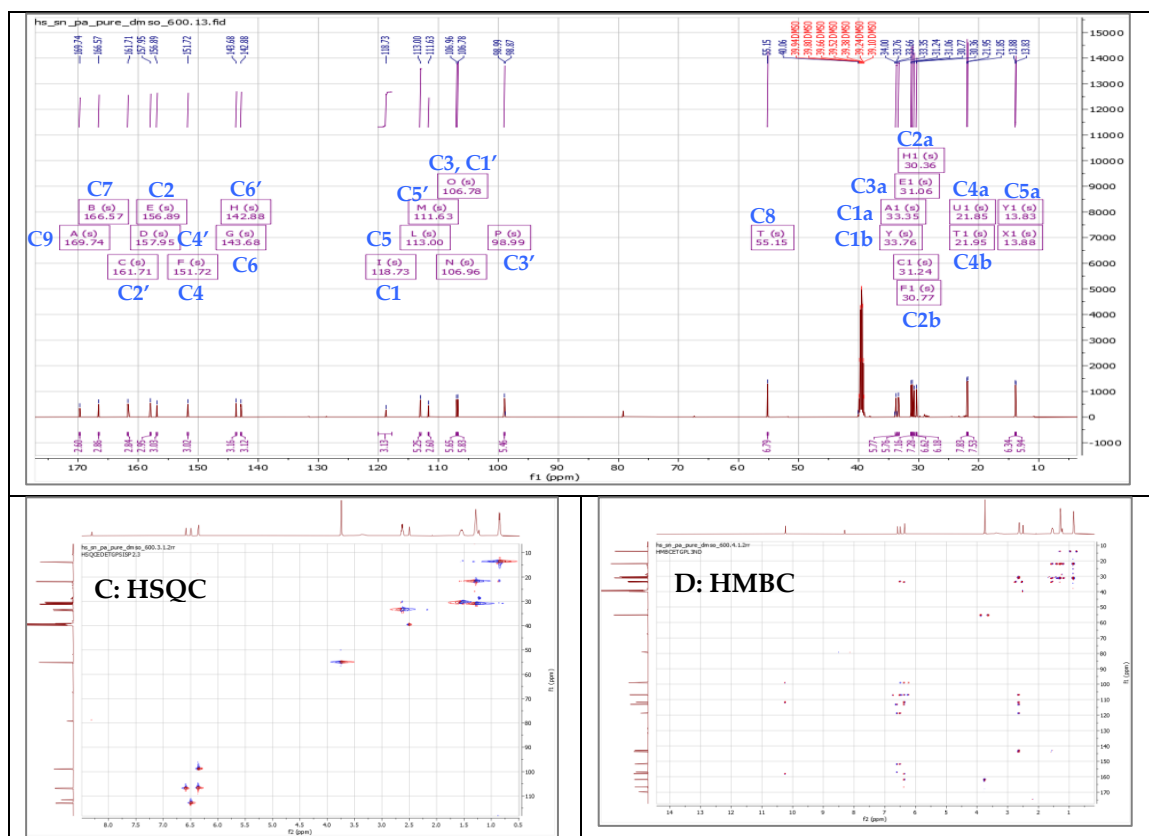

Figure S14: NMR spectra of isolated perlatolic acid

Table S4: HMBC based assignment of perlatolic acid

| Position | $\delta$ H (ppm) | $\delta$ C (ppm) | HMBC correlations                                         |
|----------|------------------|------------------|-----------------------------------------------------------|
| 1        | -                | 118.7            |                                                           |
| 2-OH     | -                | 156.9            |                                                           |
| 3        | 6.59 (d)         | 106.8            | 156.9(C2), 151.7 (C4), 113.0 (C5)                         |
| 4        | -                | 151.7            |                                                           |
| 4-OH     | -                | -                |                                                           |
| 5        | 6.50 (d)         | 113.0            | 106.8(C3), 151.7 (C4), 33.3 (C1a),                        |
| 6        | -                | 143.7            |                                                           |
| 7        | -                | 166.6            |                                                           |
| 7-OH     | -                | -                |                                                           |
| 8        | 3.74 (s)         | 55.2             | 161.7 (C2')                                               |
| 8-OH     | -                | -                |                                                           |
| 9-OH     | -                | 169.7            |                                                           |
| 1'       | -                | 106.8            |                                                           |
| 2'-OH    | 10.24 (s)        | 161.7            | 111.6 (C5'), 157.9 (C4')                                  |
| 3'       | 6.36 (d)         | 98.9             | 106.8(C1'), 161.7(C2'), 157.9 (C4'), 111.6(C5')           |
| 4'       | -                | 157.9            |                                                           |
| 5'       | 6.36 (d)         | 111.6            | 106.8(C1'), 98.9(C3'), 157.9 (C4'), 33.8 (C1b)            |
| 6'       | -                | 142.9            |                                                           |
| 1a       | 2.63 (m)         | 33.3             | 118.7 (C1), 113.0 (C5), 143.7(C6), 30.4 (C2a), 31.1 (C3a) |

|           |          |      |                                                 |
|-----------|----------|------|-------------------------------------------------|
| <b>2a</b> | 1.55 (m) | 30.4 | 33.3 (C1a), 31.1 (C3a)                          |
| <b>3a</b> | 1.28 (m) | 31.1 | 21.8(C4a), 13.8 (C5a)                           |
| <b>4a</b> | 1.28 (m) | 21.8 | 31.1 (C3a), 13.8 (C5a)                          |
| <b>5a</b> | 0.85 (t) | 13.8 | 21.8 (C4a), 31.1(C3a), 30.4(C2a)                |
| <b>1b</b> | 2.63 (m) | 33.8 | 106.8(C1'), 111.6(C5'), 142.9(C6'), 30.8 (C2b), |
| <b>2b</b> | 1.55 (m) | 30.8 | 33.8 (C1b), 31.2 (C3b)                          |
| <b>3b</b> | 1.28 (m) | 31.2 | 21.9 (C4b), 13.9 (C5b)                          |
| <b>4b</b> | 1.28 (m) | 21.9 | 13.9 (C5b)                                      |
| <b>5b</b> | 0.85 (m) | 13.9 | 21.9 (C4b), 31.2 (C3b), 30.8 (C2b)              |
